# Supplementary material
Source: PubMed Central journal article supplement (PMC3160181)
Supplement: emboj2011206s4.pdf [file emboj2011206s4.pdf]

**Gómez-González et al.**

**Supplementary Dataset III. Whole chromosome data for Hpr1-IP ChIP-chips from different cell cycle stages.** Hpr1-IP in G1, G2 and S phase patterns as histogram bars in the y axis show the average signal ratio of loci significantly enriched in the immunoprecipitated fraction along the indicated regions in log<sub>2</sub> scale. The x axis shows chromosomal coordinates. Positions of ARS elements are indicated. The horizontal bars mark the positions of the indicated ORFs.
